# Supplementary material for: miR-92a-3p Promoted EMT via Targeting LATS1 in Cervical Cancer Stem Cells
Source: Front Cell Dev Biol. 2021 Nov 18;9:757747. doi: 10.3389/fcell.2021.757747 (PMC8639224; doi:10.3389/fcell.2021.757747)
Supplement: Supplementary file 11 [file DataSheet7.ZIP]

Archive with 19 entries (19 files):
- F2C left down  control .fcs
- F2C left down miR-92a-3p mimic .fcs
- f2C left up control.fcs
- F2C left up miR-92a-3p mimic.fcs
- F2C right down  control.fcs
- F2C right down miR-92a-3p inhibitor.fcs
- F2C right up control.fcs
- F2C right up miR-92a-3p inhibitor.fcs
- F4C  left down  control.fcs
- F4C  left down  Lats1.fcs
- F4C left up control.fcs
- F4C left up lats1.fcs
- F4C right down   control.fcs
- F4C right down  silats1.fcs
- F4C right up control .fcs
- F4C right up siLats1 .fcs
- F5C left mimic control.fcs
- F5C middle miR-92a-3pmimic.fcs
- F5C right miR-92a-3pmimic+lats1.fcs
